# Supplementary material for: Genetic variants in m6A modification core genes are associated with glioma risk in Chinese children
Source: PubMed Central journal article supplement — Mol Ther Oncolytics. 2021 Jan 5;20:199–208. doi: 10.1016/j.omto.2020.12.013 (PMC7889446; doi:10.1016/j.omto.2020.12.013), 2021-01-05
Supplement: mmc1.pdf [file mmc1.pdf]

OMTO, Volume 20

## **Supplemental Information**

**Genetic variants in m<sup>6</sup>A modification  
core genes are associated  
with glioma risk in Chinese children**

**Jing He, Li Yuan, Huiran Lin, Ao Lin, Huitong Chen, Ailing Luo, Zhenjian Zhuo, and Xiaoping Liu**

**Table S1.** Frequency distribution of selected variables in glioma patients and cancer-free controls

| Variables                                  | Cases<br>(N=171) |       | Controls<br>(N=228) |       | <i>P</i> <sup>a</sup> |
|--------------------------------------------|------------------|-------|---------------------|-------|-----------------------|
|                                            | No.              | %     | No.                 | %     |                       |
| Age range, month                           | 4.00-168.00      |       | 4.00-168.00         |       | 0.623                 |
| Mean ± SD                                  | 63.40 ± 47.72    |       | 52.41 ± 32.65       |       |                       |
| <60                                        | 85               | 49.71 | 119                 | 52.19 | 0.190                 |
| ≥60                                        | 86               | 50.29 | 109                 | 47.81 |                       |
| Gender                                     |                  |       |                     |       | 0.190                 |
| Female                                     | 81               | 47.37 | 93                  | 40.79 |                       |
| Male                                       | 90               | 52.63 | 135                 | 59.21 |                       |
| Subtypes                                   |                  |       |                     |       |                       |
| Astrocytic tumors                          | 125              | 73.10 | /                   | /     |                       |
| Ependymoma                                 | 24               | 14.62 | /                   | /     |                       |
| Neuronal and mixed neuronal-gliial tumours | 14               | 8.19  | /                   | /     |                       |
| Embryonal tumors                           | 7                | 4.09  | /                   | /     |                       |
| Tumor grades                               |                  |       |                     |       |                       |
| I                                          | 103              | 60.23 | /                   | /     |                       |
| II                                         | 28               | 16.37 | /                   | /     |                       |
| III                                        | 15               | 8.77  | /                   | /     |                       |
| IV                                         | 25               | 14.62 | /                   | /     |                       |

SD, standard deviation.

<sup>a</sup> Two-sided  $\chi^2$  test for distributions between glioma patients and cancer-free controls.
